# Supplementary material for: New robust estimators for the fixed effects negative binomial model: a simulation and real-world applications to European panel data
Source: Frontiers journal article supplement (doi:10.3389/fams.2025.1638596), 2025-08-26
Supplement: Table_2.xlsx [file Table_2.xlsx]

## Sheet: Sheet1
Country Name	ID	year	PATE	GDPC	NUMRD.per1000	NUMRD	UNEMP	UNEMP%	RDEX	RDEX%	GDP	ICT.EXP	ICT.EXP%	Goods exports
Austria	1	2005	2270	38417.5	3.44933	3449.33	0.0563	5.63	7.50163e+11	2.37324	3.16092e+11	6.26492e+11	5.49321	1.14048e+11
Austria	1	2006	2271	40669.3	3.52414	3524.14	0.0524	5.24	7.93362e+11	2.35923	3.3628e+11	6.47685e+11	5.00134	1.29502e+11
Austria	1	2007	2385	46915.3	3.81003	3810.03	0.0486	4.86	9.41218e+11	2.41843	3.89186e+11	7.32528e+11	4.67135	1.56813e+11
Austria	1	2008	2298	51920	4.13693	4136.93	0.0413	4.13	1.11014e+12	2.56945	4.32052e+11	7.4946e+11	4.33694	1.72808e+11
Austria	1	2009	2263	48153.3	4.1401	4140.1	0.053	5.3	1.04326e+12	2.59674	4.01759e+11	5.28893e+11	4.01233	1.31817e+11
Austria	1	2010	2424	46903.8	4.34972	4349.72	0.0482	4.82	1.06938e+12	2.7261	3.92275e+11	5.72611e+11	3.9482	1.45031e+11
Austria	1	2011	2154	51442.3	4.39035	4390.35	0.0456	4.56	1.15203e+12	2.66868	4.31685e+11	6.45979e+11	3.7939	1.70268e+11
Austria	1	2012	2258	48564.9	4.66945	4669.45	0.0487	4.87	1.19329e+12	2.91472	4.09402e+11	6.23021e+11	3.88947	1.60182e+11
Austria	1	2013	2162	50731.1	4.72472	4724.72	0.0533	5.33	1.27118e+12	2.95492	4.30191e+11	6.91063e+11	4.20613	1.64299e+11
Austria	1	2014	2092	51786.4	4.94787	4947.88	0.0562	5.62	1.36506e+12	3.08429	4.42585e+11	7.16271e+11	4.27707	1.67468e+11
Austria	1	2015	2205	44195.8	5.01944	5019.44	0.0572	5.72	1.16489e+12	3.04969	3.81971e+11	5.89937e+11	4.11608	1.43325e+11
Austria	1	2016	2078	45307.6	5.37224	5372.24	0.0601	6.01	1.23365e+12	3.11655	3.95837e+11	5.51889e+11	3.79109	1.45575e+11
Austria	1	2017	2073	47429.2	5.38793	5387.93	0.055	5.5	1.27538e+12	3.05656	4.17261e+11	5.51223e+11	3.48322	1.58251e+11
Austria	1	2018	2039	51486.6	5.63906	5639.06	0.0485	4.85	1.40673e+12	3.09058	4.55168e+11	6.01554e+11	3.41215	1.76298e+11
Austria	1	2019	2066	50114.4	5.89544	5895.44	0.0449	4.49	1.39276e+12	3.12972	4.45012e+11	5.31983e+11	3.12856	1.70041e+11
Austria	1	2020	2124	48588.7	5.75132	5751.32	0.0536	5.36	1.38698e+12	3.20128	4.33258e+11	4.89332e+11	3.09427	1.58141e+11
Belgium	2	2005	517	36809.7	3.14273	3142.73	0.0844	8.44	6.90665e+11	1.79061	3.85715e+11	8.78733e+11	3.85515	2.27937e+11
Belgium	2	2006	490	38705.1	3.28443	3284.43	0.0825	8.25	7.44131e+11	1.82269	4.0826e+11	8.20077e+11	3.32048	2.46976e+11
Belgium	2	2007	454	44319.2	3.39502	3395.02	0.0746	7.46	8.71201e+11	1.84999	4.70922e+11	7.76507e+11	2.69881	2.87722e+11
Belgium	2	2008	575	48303.4	3.41175	3411.75	0.0698	6.98	1.00198e+12	1.93684	5.17328e+11	8.14846e+11	2.58308	3.15455e+11
Belgium	2	2009	669	44760.3	3.51985	3519.85	0.0791	7.91	9.65832e+11	1.9986	4.83254e+11	6.03117e+11	2.49508	2.41722e+11
Belgium	2	2010	620	44184.9	3.73283	3732.83	0.0829	8.29	9.92632e+11	2.06188	4.81421e+11	5.5189e+11	2.03337	2.71417e+11
Belgium	2	2011	636	47410.6	3.87564	3875.64	0.0714	7.14	1.13736e+12	2.17332	5.2333e+11	5.56105e+11	1.71671	3.23937e+11
Belgium	2	2012	755	44670.6	4.11326	4113.26	0.0754	7.54	1.13179e+12	2.28114	4.96153e+11	5.19359e+11	1.72635	3.00843e+11
Belgium	2	2013	715	46758	4.15591	4155.91	0.0843	8.43	1.21615e+12	2.33073	5.21791e+11	5.27903e+11	1.68813	3.12714e+11
Belgium	2	2014	889	47764.1	4.52892	4528.92	0.0852	8.52	1.26889e+12	2.37002	5.3539e+11	5.40557e+11	1.73832	3.10964e+11
Belgium	2	2015	949	41008.3	4.71105	4711.05	0.0848	8.48	1.12263e+12	2.42817	4.62336e+11	5.46561e+11	2.17995	2.50722e+11
Belgium	2	2016	1054	42012.6	4.78052	4780.52	0.0783	7.83	1.20129e+12	2.52338	4.76063e+11	5.42629e+11	2.01675	2.69061e+11
Belgium	2	2017	1001	44198.5	4.72955	4729.55	0.0709	7.09	1.3407e+12	2.66666	5.02765e+11	5.87134e+11	1.95468	3.00373e+11
Belgium	2	2018	892	47549.2	5.00395	5003.95	0.0595	5.95	1.55414e+12	2.86031	5.43347e+11	5.76186e+11	1.76571	3.2632e+11
Belgium	2	2019	876	46599.1	5.25321	5253.21	0.0536	5.36	1.69179e+12	3.16	5.35376e+11	6.84508e+11	2.16689	3.15894e+11
Belgium	2	2020	862	45189.4	5.75014	5750.14	0.0555	5.55	1.81398e+12	3.4772	5.21677e+11	7.26769e+11	2.45521	2.96011e+11
Czechia	3	2005	586	13430.7	2.35608	2356.08	0.0793	7.93	1.59224e+11	1.161	1.37143e+11	7.93033e+11	11.0829	7.1555e+10
Czechia	3	2006	641	15261.8	2.55057	2550.57	0.0715	7.15	1.91489e+11	1.22542	1.56264e+11	1.11156e+12	12.9596	8.57717e+10
Czechia	3	2007	716	18466.5	2.69155	2691.55	0.0532	5.32	2.46425e+11	1.29572	1.90184e+11	1.48763e+12	13.9009	1.07017e+11
Czechia	3	2008	712	22804.6	2.85702	2857.02	0.0439	4.39	2.92132e+11	1.23358	2.36816e+11	1.78279e+12	14.1105	1.26345e+11
Czechia	3	2009	789	19861.7	2.74208	2742.08	0.0666	6.66	2.66877e+11	1.28656	2.07434e+11	1.45926e+12	14.4444	1.01026e+11
Czechia	3	2010	868	19960.1	2.77396	2773.96	0.0728	7.28	2.77373e+11	1.3267	2.0907e+11	1.72734e+12	15.0108	1.15073e+11
Czechia	3	2011	783	21871.3	2.90366	2903.66	0.0671	6.71	3.54622e+11	1.54477	2.29563e+11	2.11368e+12	15.3284	1.37893e+11
Czechia	3	2012	867	19870.8	3.13924	3139.24	0.0698	6.98	3.69609e+11	1.76967	2.08858e+11	1.94895e+12	14.5308	1.34125e+11
Czechia	3	2013	984	20133.2	3.23724	3237.24	0.0695	6.95	3.97808e+11	1.87924	2.11686e+11	1.79625e+12	13.1118	1.36995e+11
Czechia	3	2014	910	19890.9	3.40283	3402.83	0.0611	6.11	4.09994e+11	1.95833	2.09359e+11	1.96763e+12	13.4191	1.46629e+11
Czechia	3	2015	880	17829.7	3.59207	3592.07	0.0505	5.05	3.60439e+11	1.91689	1.88033e+11	1.73489e+12	13.536	1.28169e+11
Czechia	3	2016	792	18575.2	3.51617	3516.17	0.0395	3.95	3.2778e+11	1.67003	1.96272e+11	1.66479e+12	12.715	1.30931e+11
Czechia	3	2017	794	20636.2	3.68203	3682.03	0.0289	2.89	3.86656e+11	1.76855	2.18629e+11	1.9448e+12	13.3346	1.45846e+11
Czechia	3	2018	678	23419.7	3.86268	3862.68	0.0224	2.24	4.72868e+11	1.89945	2.4895e+11	2.43307e+12	15.1039	1.61089e+11
Czechia	3	2019	765	23660.1	3.976	3976	0.0201	2.01	4.86748e+11	1.92773	2.52498e+11	2.52428e+12	16.1705	1.56104e+11
Czechia	3	2020	673	22933.5	4.12793	4127.93	0.0255	2.55	4.8848e+11	1.99104	2.45339e+11	2.62532e+12	17.887	1.46772e+11
Denmark	4	2005	1658	48799.8	5.19745	5197.45	0.0483	4.83	6.32968e+11	2.39337	2.64467e+11	4.02914e+11	4.94292	8.15133e+10
Denmark	4	2006	1503	52027	5.29845	5298.45	0.039	3.9	6.79773e+11	2.403	2.82885e+11	4.1409e+11	4.57482	9.0515e+10
Denmark	4	2007	1660	58487.1	5.51636	5516.36	0.038	3.8	8.03481e+11	2.51541	3.19423e+11	4.73118e+11	4.65489	1.01639e+11
Denmark	4	2008	1634	64322.1	6.4939	6493.9	0.0368	3.68	9.80033e+11	2.77346	3.53361e+11	3.98734e+11	3.37224	1.1824e+11
Denmark	4	2009	1518	58163.3	6.65697	6656.97	0.0641	6.41	9.81437e+11	3.05514	3.21241e+11	3.21109e+11	3.39008	9.47203e+10
Denmark	4	2010	1626	58041.4	6.73918	6739.18	0.0775	7.75	9.39283e+11	2.91707	3.21995e+11	3.69303e+11	3.65167	1.01132e+11
Denmark	4	2011	1574	61753.6	7.01794	7017.94	0.0777	7.77	1.01297e+12	2.94465	3.44003e+11	4.00665e+11	3.39906	1.17876e+11
Denmark	4	2012	1406	58507.5	7.14329	7143.29	0.078	7.8	9.75313e+11	2.98125	3.27149e+11	3.65367e+11	3.28308	1.11288e+11
Denmark	4	2013	1341	61191.2	7.07114	7071.14	0.0738	7.38	1.02061e+12	2.97048	3.43584e+11	3.77861e+11	3.23192	1.16915e+11
Denmark	4	2014	1377	62549	7.31066	7310.66	0.0693	6.93	1.02866e+12	2.91409	3.52994e+11	4.28247e+11	3.58523	1.19447e+11
Denmark	4	2015	1462	53254.9	7.52826	7528.26	0.0628	6.28	9.24657e+11	3.05497	3.02673e+11	3.78714e+11	3.66451	1.03346e+11
Denmark	4	2016	1552	54664	7.84666	7846.66	0.0599	5.99	9.68414e+11	3.09283	3.13116e+11	3.81453e+11	3.67413	1.03821e+11
Denmark	4	2017	1490	57610.1	7.66991	7669.91	0.0583	5.83	9.73527e+11	2.93124	3.32121e+11	4.30304e+11	3.86697	1.11277e+11
Denmark	4	2018	1262	61591.9	7.63613	7636.13	0.0513	5.13	1.0584e+12	2.96603	3.56841e+11	4.43598e+11	3.71797	1.19312e+11
Denmark	4	2019	1351	59775.7	7.73942	7739.42	0.0502	5.02	1.00376e+12	2.888	3.47561e+11	4.42885e+11	3.64799	1.21405e+11
Denmark	4	2020	1261	61063.3	7.69189	7691.89	0.0564	5.64	1.05456e+12	2.96154	3.56085e+11	4.72449e+11	3.95505	1.19455e+11
Spain	5	2005	3040	26429.2	2.49256	2492.56	0.0915	9.15	1.26858e+12	1.09956	1.15372e+12	7.28185e+11	3.73287	1.95074e+11
Spain	5	2006	3111	28389.1	2.58891	2588.91	0.0845	8.45	1.48351e+12	1.17702	1.2604e+12	7.334e+11	3.43254	2.13661e+11
Spain	5	2007	3267	32591.4	2.69924	2699.24	0.0823	8.23	1.82854e+12	1.24053	1.474e+12	6.90863e+11	2.63574	2.62113e+11
Spain	5	2008	3632	35510.7	2.84328	2843.28	0.1125	11.25	2.16222e+12	1.325	1.63186e+12	6.96837e+11	2.44228	2.85323e+11
Spain	5	2009	3596	32169.5	2.87233	2872.33	0.1786	17.86	2.03383e+12	1.36364	1.49147e+12	5.03009e+11	2.18861	2.29831e+11
Spain	5	2010	3566	30532.5	2.86917	2869.17	0.1986	19.86	1.93401e+12	1.35996	1.42211e+12	5.6129e+11	2.20489	2.54565e+11
Spain	5	2011	3430	31677.9	2.766	2766	0.2139	21.39	1.97439e+12	1.33341	1.48071e+12	4.90067e+11	1.61091	3.04217e+11
Spain	5	2012	3266	28322.8	2.69378	2693.78	0.2479	24.79	1.72054e+12	1.29877	1.32474e+12	3.71387e+11	1.27399	2.91515e+11
Spain	5	2013	3026	29067.8	2.62568	2625.68	0.2609	26.09	1.72812e+12	1.27523	1.35514e+12	3.37917e+11	1.0676	3.16521e+11
Spain	5	2014	2953	29500.8	2.6131	2613.1	0.2444	24.44	1.70324e+12	1.24213	1.37122e+12	3.65701e+11	1.13751	3.21491e+11
Spain	5	2015	2799	25742.4	2.62335	2623.35	0.2206	22.06	1.46145e+12	1.22236	1.1956e+12	3.50266e+11	1.2487	2.80504e+11
Spain	5	2016	2745	26523.3	2.71547	2715.47	0.1963	19.63	1.46776e+12	1.19048	1.23291e+12	3.92925e+11	1.36852	2.87116e+11
Spain	5	2017	2167	28170.2	2.85575	2855.75	0.1722	17.22	1.58872e+12	1.21042	1.31254e+12	4.8123e+11	1.5157	3.17496e+11
Spain	5	2018	1525	30364.6	3.00089	3000.89	0.1525	15.25	1.76506e+12	1.24213	1.42099e+12	4.99032e+11	1.45065	3.44007e+11
Spain	5	2019	1288	29554.5	3.08053	3080.53	0.141	14.1	1.74324e+12	1.25139	1.39305e+12	5.37055e+11	1.62771	3.29944e+11
Spain	5	2020	1431	27056.4	3.10924	3109.24	0.1553	15.53	1.80101e+12	1.40541	1.28148e+12	5.21828e+11	1.72466	3.0257e+11
Finland	6	2005	1830	39054.9	7.52663	7526.63	0.0838	8.38	6.80978e+11	3.3237	2.04885e+11	1.42122e+12	20.2911	7.00417e+10
Finland	6	2006	1816	41222.6	7.65722	7657.22	0.0772	7.72	7.23374e+11	3.33215	2.17089e+11	1.40343e+12	17.1353	8.19029e+10
Finland	6	2007	1804	48476.4	7.36154	7361.54	0.0685	6.85	8.55544e+11	3.33704	2.56378e+11	1.53682e+12	15.5839	9.86157e+10
Finland	6	2008	1799	53772.8	7.68481	7684.81	0.0637	6.37	1.01057e+12	3.53697	2.85716e+11	1.56911e+12	14.8824	1.05434e+11
Finland	6	2009	1806	47481.5	7.64634	7646.34	0.0825	8.25	9.46565e+11	3.73402	2.53498e+11	7.70035e+11	10.7298	7.17661e+10
Finland	6	2010	1731	46505.3	7.72022	7720.22	0.0839	8.39	9.24197e+11	3.70532	2.49424e+11	4.77595e+11	6.36462	7.5039e+10
Finland	6	2011	1650	51148.9	7.42158	7421.58	0.0778	7.78	9.97153e+11	3.61806	2.75604e+11	4.08337e+11	4.91792	8.30304e+10
Finland	6	2012	1698	47708.1	7.47371	7473.71	0.0769	7.69	8.77752e+11	3.39832	2.5829e+11	3.05388e+11	3.97847	7.67602e+10
Finland	6	2013	1596	49892.2	7.20653	7206.53	0.0819	8.19	8.87727e+11	3.27137	2.71362e+11	1.79635e+11	2.30902	7.77968e+10
Finland	6	2014	1419	50327.2	7.00929	7009.29	0.0866	8.66	8.65134e+11	3.14751	2.74863e+11	1.94885e+11	2.61733	7.44595e+10
Finland	6	2015	1289	42801.9	6.84455	6844.55	0.0938	9.38	6.73573e+11	2.87196	2.34534e+11	1.4483e+11	2.46282	5.88067e+10
Finland	6	2016	1260	43814	6.53148	6531.48	0.0882	8.82	6.55962e+11	2.72442	2.40771e+11	1.57256e+11	2.69497	5.83516e+10
Finland	6	2017	1390	46412.1	6.72183	6721.83	0.0864	8.64	6.97374e+11	2.72787	2.55648e+11	1.8106e+11	2.69442	6.71983e+10
Finland	6	2018	1387	49988.9	6.86115	6861.15	0.0736	7.36	7.60262e+11	2.75742	2.75715e+11	1.93083e+11	2.59862	7.43024e+10
Finland	6	2019	1321	48628.6	7.22754	7227.54	0.0669	6.69	7.50972e+11	2.79683	2.68508e+11	1.8735e+11	2.57737	7.26902e+10
Finland	6	2020	1588	49160.8	7.52736	7527.36	0.0776	7.76	7.97961e+11	2.93544	2.71837e+11	1.69372e+11	2.49906	6.7774e+10
Croatia	7	2005	363	10621.5	1.30811	1308.11	0.126	12.6	3.88569e+10	0.84877	4.57802e+10	1.94138e+10	2.57983	7.52524e+09
Croatia	7	2006	317	11797.5	1.32196	1321.96	0.1113	11.13	3.73272e+10	0.73391	5.08608e+10	2.41128e+10	2.68654	8.97544e+09
Croatia	7	2007	344	14046.3	1.40495	1404.95	0.0991	9.91	4.75999e+10	0.78622	6.05427e+10	2.97818e+10	2.83285	1.0513e+10
Croatia	7	2008	330	16416.6	1.53861	1538.61	0.0853	8.53	6.22896e+10	0.88041	7.07506e+10	3.14495e+10	2.68548	1.1711e+10
Croatia	7	2009	250	14653	1.59654	1596.54	0.092	9.2	5.28802e+10	0.83825	6.3084e+10	2.38637e+10	2.60201	9.17128e+09
Croatia	7	2010	257	14067.5	1.64134	1641.34	0.1162	11.62	4.44325e+10	0.73532	6.0426e+10	2.24214e+10	2.09857	1.06842e+10
Croatia	7	2011	230	14757.2	1.58749	1587.49	0.1368	13.68	4.68253e+10	0.74126	6.31699e+10	1.88635e+10	1.54842	1.21824e+10
Croatia	7	2012	217	13401.7	1.55684	1556.84	0.1593	15.93	4.24281e+10	0.74185	5.71923e+10	2.10713e+10	1.89152	1.11399e+10
Croatia	7	2013	230	13837.7	1.52668	1526.68	0.1725	17.25	4.71177e+10	0.80011	5.88891e+10	3.02739e+10	2.55397	1.18537e+10
Croatia	7	2014	170	13762.4	1.43743	1437.43	0.1729	17.29	4.51377e+10	0.77383	5.83303e+10	2.52041e+10	2.01221	1.25256e+10
Croatia	7	2015	169	11933.4	1.50418	1504.18	0.1618	16.18	4.16094e+10	0.82948	5.01632e+10	2.77032e+10	2.44873	1.13133e+10
Croatia	7	2016	175	12527.7	1.8505	1850.5	0.131	13.1	4.45356e+10	0.85162	5.22952e+10	3.14264e+10	2.70098	1.16352e+10
Croatia	7	2017	148	13629.3	1.86834	1868.34	0.1121	11.21	4.77216e+10	0.84892	5.62144e+10	3.32148e+10	2.51035	1.32312e+10
Croatia	7	2018	121	15227.6	1.92113	1921.13	0.0843	8.43	5.92787e+10	0.9523	6.22479e+10	3.36514e+10	2.32967	1.44447e+10
Croatia	7	2019	195	15311.8	2.13544	2135.44	0.0662	6.62	6.72913e+10	1.08105	6.22462e+10	3.35038e+10	2.32681	1.4399e+10
Croatia	7	2020	117	14132.5	2.21983	2219.83	0.0751	7.51	7.14155e+10	1.24844	5.72038e+10	3.40062e+10	2.44405	1.39138e+10
Hungary	8	2005	705	11225.9	1.57427	1574.27	0.0719	7.19	1.041e+11	0.91931	1.13237e+11	1.53869e+12	25.6043	6.00951e+10
Hungary	8	2006	718	11493.1	1.74499	1744.99	0.0749	7.49	1.13101e+11	0.9771	1.15751e+11	1.72119e+12	24.0913	7.14444e+10
Hungary	8	2007	689	13945	1.73491	1734.91	0.0741	7.41	1.33801e+11	0.95417	1.40228e+11	2.06392e+12	22.5194	9.16506e+10
Hungary	8	2008	683	15777.2	1.85191	1851.91	0.0782	7.82	1.54775e+11	0.97727	1.58374e+11	2.39654e+12	22.6616	1.05754e+11
Hungary	8	2009	757	13081.8	2.01457	2014.57	0.1003	10.03	1.47848e+11	1.12763	1.31114e+11	2.06132e+12	25.9953	7.92957e+10
Hungary	8	2010	649	13223.1	2.14981	2149.81	0.1117	11.17	1.49179e+11	1.12817	1.32231e+11	2.24086e+12	25.5855	8.7583e+10
Hungary	8	2011	662	14240.3	2.32617	2326.17	0.1103	11.03	1.67385e+11	1.17877	1.42e+11	2.15374e+12	21.5783	9.98104e+10
Hungary	8	2012	692	12989.2	2.41648	2416.48	0.11	11	1.61563e+11	1.25381	1.28857e+11	1.56845e+12	17.4499	8.98833e+10
Hungary	8	2013	642	13720	2.54608	2546.08	0.1018	10.18	1.87801e+11	1.38361	1.35733e+11	1.37763e+12	14.7658	9.32986e+10
Hungary	8	2014	546	14298.8	2.67343	2673.43	0.0773	7.73	1.89634e+11	1.34417	1.41079e+11	1.1687e+12	11.9188	9.80552e+10
Hungary	8	2015	569	12720.7	2.5891	2589.1	0.0681	6.81	1.67682e+11	1.3392	1.2521e+11	1.01166e+12	11.6238	8.70337e+10
Hungary	8	2016	616	13107.4	2.64576	2645.76	0.0511	5.11	1.51743e+11	1.17963	1.28636e+11	9.89847e+11	11.3843	8.69485e+10
Hungary	8	2017	496	14623.7	2.92153	2921.53	0.0416	4.16	1.88482e+11	1.3168	1.43136e+11	1.07676e+12	11.1838	9.62784e+10
Hungary	8	2018	407	16427.4	3.87391	3873.91	0.0371	3.71	2.42093e+11	1.50755	1.60587e+11	1.18645e+12	11.3424	1.04603e+11
Hungary	8	2019	427	16735.7	4.05744	4057.44	0.0342	3.42	2.41587e+11	1.47736	1.63526e+11	1.32833e+12	12.8195	1.03618e+11
Hungary	8	2020	428	16076	4.35792	4357.92	0.0425	4.25	2.5199e+11	1.60766	1.56743e+11	1.33306e+12	13.1356	1.01485e+11
Lithuania	9	2005	68	7854.77	2.28361	2283.61	0.0832	8.32	1.95265e+10	0.74821	2.60977e+10	5.91987e+10	5.28087	1.121e+10
Lithuania	9	2006	65	9230.71	2.41574	2415.74	0.0578	5.78	2.39066e+10	0.79204	3.01836e+10	6.34369e+10	4.67447	1.35709e+10
Lithuania	9	2007	62	12285.4	2.59805	2598.05	0.0425	4.25	3.18274e+10	0.80174	3.96979e+10	6.29426e+10	3.87505	1.6243e+10
Lithuania	9	2008	87	14945	2.62476	2624.76	0.0583	5.83	3.77276e+10	0.78932	4.77976e+10	6.85074e+10	3.02062	2.268e+10
Lithuania	9	2009	91	11820.8	2.68055	2680.55	0.1379	13.79	3.10635e+10	0.83084	3.73881e+10	3.87205e+10	2.48696	1.55694e+10
Lithuania	9	2010	108	11987.5	2.75272	2752.72	0.1781	17.81	2.90829e+10	0.7833	3.71287e+10	5.25976e+10	2.71001	1.94086e+10
Lithuania	9	2011	93	14376.9	2.72102	2721.02	0.1539	15.39	3.92987e+10	0.90269	4.35351e+10	6.29991e+10	2.40166	2.62315e+10
Lithuania	9	2012	109	14367.7	2.63433	2634.33	0.1336	13.36	3.83359e+10	0.89304	4.29275e+10	6.2256e+10	2.26514	2.74844e+10
Lithuania	9	2013	117	15729.7	2.84386	2843.86	0.1177	11.77	4.41377e+10	0.94872	4.65234e+10	7.13548e+10	2.42759	2.93933e+10
Lithuania	9	2014	123	16551	3.05402	3054.02	0.107	10.7	4.9995e+10	1.03011	4.85337e+10	8.01488e+10	2.93856	2.72749e+10
Lithuania	9	2015	101	14264	2.78558	2785.58	0.0912	9.12	4.32342e+10	1.04341	4.14355e+10	8.60324e+10	3.94683	2.17978e+10
Lithuania	9	2016	95	15008.3	2.95028	2950.28	0.0786	7.86	3.62635e+10	0.84241	4.30473e+10	8.32139e+10	3.86378	2.15369e+10
Lithuania	9	2017	81	16885.4	3.07196	3071.96	0.0707	7.07	4.28042e+10	0.89626	4.77587e+10	1.05005e+11	4.07604	2.57616e+10
Lithuania	9	2018	81	19186.2	3.1907	3190.7	0.0615	6.15	5.03447e+10	0.93663	5.37509e+10	1.00737e+11	3.47902	2.89555e+10
Lithuania	9	2019	90	19575.8	3.4896	3489.6	0.0626	6.26	5.44064e+10	0.99468	5.46974e+10	1.00039e+11	3.44376	2.90493e+10
Lithuania	9	2020	95	20232.3	3.72848	3728.48	0.0849	8.49	6.53276e+10	1.15528	5.6547e+10	1.14739e+11	3.92454	2.92362e+10
Luxembourg	10	2005	24	80988.1	4.86412	4864.12	0.0449	4.49	5.87209e+10	1.55873	3.76723e+10	1.13091e+11	7.85199	1.44029e+10
Luxembourg	10	2006	26	90788.8	4.41185	4411.85	0.0473	4.73	7.07528e+10	1.64886	4.29101e+10	1.00483e+11	5.92049	1.69721e+10
Luxembourg	10	2007	15	107475	4.63367	4633.67	0.0407	4.07	8.10773e+10	1.57165	5.15874e+10	9.0507e+10	4.67383	1.93646e+10
Luxembourg	10	2008	48	120422	4.71277	4712.77	0.0506	5.06	9.10103e+10	1.54663	5.88443e+10	7.09331e+10	3.02662	2.34364e+10
Luxembourg	10	2009	60	109420	4.82632	4826.32	0.0512	5.12	8.65153e+10	1.58839	5.44673e+10	5.66912e+10	3.20798	1.76719e+10
Luxembourg	10	2010	79	110886	5.14498	5144.98	0.0436	4.36	8.00335e+10	1.42373	5.6214e+10	6.61943e+10	2.86959	2.30675e+10
Luxembourg	10	2011	85	119025	5.45136	5451.36	0.049	4.9	8.78882e+10	1.42453	6.16963e+10	8.13587e+10	2.86789	2.83688e+10
Luxembourg	10	2012	109	112585	4.35217	4352.17	0.0514	5.14	7.21286e+10	1.20664	5.97764e+10	7.19488e+10	2.78049	2.58763e+10
Luxembourg	10	2013	113	120000	4.61422	4614.22	0.0585	5.85	8.04485e+10	1.23381	6.52033e+10	5.5587e+10	2.00086	2.77816e+10
Luxembourg	10	2014	128	123679	4.74107	4741.07	0.0585	5.85	8.37355e+10	1.217	6.88048e+10	5.57005e+10	1.9973	2.78878e+10
Luxembourg	10	2015	128	105462	4.60493	4604.93	0.0667	6.67	7.52252e+10	1.25226	6.00716e+10	5.41219e+10	2.28828	2.36518e+10
Luxembourg	10	2016	143	106899	4.77658	4776.58	0.0629	6.29	7.88226e+10	1.2669	6.22169e+10	5.95215e+10	2.49189	2.3886e+10
Luxembourg	10	2017	156	110193	4.96021	4960.21	0.0552	5.52	8.14161e+10	1.23898	6.57122e+10	6.242e+10	2.35993	2.64499e+10
Luxembourg	10	2018	152	117255	4.73848	4738.48	0.0559	5.59	8.31982e+10	1.16712	7.1285e+10	6.83203e+10	2.40163	2.84475e+10
Luxembourg	10	2019	117	113219	5.07691	5076.91	0.0559	5.59	8.25951e+10	1.17664	7.01957e+10	6.30536e+10	2.20934	2.85396e+10
Luxembourg	10	2020	129	116356	4.9203	4920.3	0.0677	6.77	8.27863e+10	1.1286	7.33531e+10	4.47377e+10	1.71474	2.609e+10
Latvia	11	2005	112	7594.9	1.45738	1457.38	0.1003	10.03	8.96201e+09	0.52707	1.70035e+10	9.37542e+09	1.95202	4.80293e+09
Latvia	11	2006	114	9723.45	1.76849	1768.49	0.0703	7.03	1.39539e+10	0.64691	2.15701e+10	1.59182e+10	2.83177	5.62129e+09
Latvia	11	2007	139	14113.5	1.89119	1891.19	0.0605	6.05	1.71131e+10	0.55107	3.10544e+10	2.65763e+10	3.42415	7.76143e+09
Latvia	11	2008	206	16467.1	2.01266	2012.66	0.0774	7.74	2.06951e+10	0.5772	3.58543e+10	4.18764e+10	4.61009	9.08365e+09
Latvia	11	2009	240	12331.9	1.68828	1688.28	0.1751	17.51	1.18474e+10	0.44858	2.64109e+10	3.96178e+10	5.64397	7.01949e+09
Latvia	11	2010	178	11421	1.83872	1838.72	0.1948	19.48	1.45105e+10	0.60571	2.39562e+10	5.09566e+10	5.77179	8.82855e+09
Latvia	11	2011	173	13339	1.88526	1885.26	0.1621	16.21	1.96612e+10	0.71562	2.74744e+10	6.29465e+10	5.38858	1.16815e+10
Latvia	11	2012	193	13847.3	1.88689	1886.89	0.1505	15.05	1.86786e+10	0.66307	2.81699e+10	7.66372e+10	6.13792	1.24859e+10
Latvia	11	2013	225	15007.5	1.77265	1772.65	0.1187	11.87	1.85219e+10	0.61321	3.02048e+10	1.0032e+11	7.6713	1.30773e+10
Latvia	11	2014	103	15742.4	1.85433	1854.33	0.1085	10.85	2.16281e+10	0.68908	3.13869e+10	1.32374e+11	9.66697	1.36934e+10
Latvia	11	2015	136	13786.5	1.8086	1808.6	0.0987	9.87	1.68979e+10	0.61981	2.72631e+10	1.31583e+11	11.3643	1.15787e+10
Latvia	11	2016	95	14331.8	1.59654	1596.54	0.0964	9.64	1.22203e+10	0.43514	2.80836e+10	1.2158e+11	10.4723	1.16097e+10
Latvia	11	2017	90	15695.1	1.78464	1784.64	0.0872	8.72	1.55784e+10	0.51104	3.04838e+10	1.21507e+11	9.23198	1.31615e+10
Latvia	11	2018	86	17865	1.7921	1792.1	0.0741	7.41	2.19895e+10	0.63869	3.4429e+10	1.2528e+11	8.43573	1.48511e+10
Latvia	11	2019	82	17926.8	1.90482	1904.82	0.0631	6.31	2.18523e+10	0.63693	3.43088e+10	1.2774e+11	8.94257	1.42845e+10
Latvia	11	2020	93	17704	2.15884	2158.84	0.081	8.1	2.37369e+10	0.7055	3.36455e+10	1.67224e+11	10.8778	1.5373e+10
Netherlands	12	2005	2217	41994.7	2.92378	2923.78	0.0587	5.87	1.21573e+12	1.77388	6.85348e+11	5.93509e+12	16.7843	3.53609e+11
Netherlands	12	2006	2168	44900.9	3.23295	3232.95	0.05	5	1.27757e+12	1.74067	7.33955e+11	6.24434e+12	15.5498	4.01569e+11
Netherlands	12	2007	2079	51799.2	3.09312	3093.12	0.0415	4.15	1.41735e+12	1.6703	8.48559e+11	6.71921e+12	14.1818	4.73792e+11
Netherlands	12	2008	2421	57879.9	3.06173	3061.73	0.0365	3.65	1.54459e+12	1.62269	9.5187e+11	6.22448e+12	11.5701	5.37979e+11
Netherlands	12	2009	2575	52722.2	2.82431	2824.31	0.0435	4.35	1.45169e+12	1.6657	8.71519e+11	5.2348e+12	12.3619	4.23464e+11
Netherlands	12	2010	2527	50999.7	3.21904	3219.04	0.0499	4.99	1.44397e+12	1.70404	8.47381e+11	5.95001e+12	12.4566	4.77657e+11
Netherlands	12	2011	2585	54230.3	3.66437	3664.37	0.0498	4.98	1.70309e+12	1.88131	9.05271e+11	6.27699e+12	11.3119	5.54904e+11
Netherlands	12	2012	2375	50070.1	4.36135	4361.35	0.0582	5.82	1.6076e+12	1.91627	8.38923e+11	5.75655e+12	10.5298	5.46694e+11
Netherlands	12	2013	2315	52198.9	4.91566	4915.66	0.0724	7.24	1.89124e+12	2.15606	8.77173e+11	5.8268e+12	10.2652	5.67629e+11
Netherlands	12	2014	2294	52900.5	4.95545	4955.45	0.0742	7.42	1.93895e+12	2.1733	8.92168e+11	6.13357e+12	10.7421	5.70983e+11
Netherlands	12	2015	2207	45193.4	4.92889	4928.89	0.0687	6.87	1.64297e+12	2.14606	7.65573e+11	4.94261e+12	10.6483	4.6417e+11
Netherlands	12	2016	2290	46039.1	5.15932	5159.32	0.0601	6.01	1.68637e+12	2.15081	7.8406e+11	5.00098e+12	10.7406	4.65613e+11
Netherlands	12	2017	2241	48675.2	5.34758	5347.58	0.0484	4.84	1.81664e+12	2.17857	8.3387e+11	5.46229e+12	10.4916	5.20637e+11
Netherlands	12	2018	2111	53044.5	5.59657	5596.57	0.0383	3.83	1.95496e+12	2.1388	9.14043e+11	5.83101e+12	10.184	5.72564e+11
Netherlands	12	2019	2228	52476.3	5.71517	5715.17	0.0338	3.38	1.98818e+12	2.18435	9.10194e+11	5.63633e+12	10.2689	5.48875e+11
Netherlands	12	2020	2198	52396	5.91169	5911.69	0.0382	3.82	2.09662e+12	2.29423	9.13865e+11	5.91373e+12	11.158	5.29999e+11
Norway	13	2005	1143	66810.5	4.57656	4576.56	0.0438	4.38	4.57887e+11	1.48239	3.08884e+11	1.26318e+11	1.22183	1.03384e+11
Norway	13	2006	1119	74148.3	4.83193	4831.93	0.034	3.4	5.02931e+11	1.45532	3.45581e+11	1.46474e+11	1.20399	1.21657e+11
Norway	13	2007	1225	85140	5.15968	5159.68	0.0249	2.49	6.27294e+11	1.56457	4.00937e+11	1.66342e+11	1.22436	1.3586e+11
Norway	13	2008	1150	96944.1	5.36112	5361.12	0.0255	2.55	7.18558e+11	1.55448	462250000000	2.09773e+11	1.22183	1.71688e+11
Norway	13	2009	1246	79977.7	5.4431	5443.1	0.031	3.1	6.6607e+11	1.72472	3.8619e+11	1.804e+11	1.54437	1.16811e+11
Norway	13	2010	1117	87693.8	5.41377	5413.77	0.0352	3.52	7.07445e+11	1.64999	4.28757e+11	1.84707e+11	1.43052	1.29119e+11
Norway	13	2011	1122	100601	5.50246	5502.46	0.0321	3.21	8.10767e+11	1.62712	4.98283e+11	1.70084e+11	1.03223	1.64773e+11
Norway	13	2012	1009	101524	5.55297	5552.97	0.0312	3.12	8.25844e+11	1.62087	5.09506e+11	1.26857e+11	0.793723	1.59825e+11
Norway	13	2013	1101	102913	5.57383	5573.83	0.0342	3.42	8.63801e+11	1.65238	5.22762e+11	1.24056e+11	0.798799	1.55303e+11
Norway	13	2014	1106	97019.2	5.68563	5685.63	0.0348	3.48	8.54803e+11	1.71506	4.9841e+11	1.26493e+11	0.879425	1.43836e+11
Norway	13	2015	1153	74355.5	5.89096	5890.96	0.043	4.3	7.46626e+11	1.93526	3.85802e+11	1.12133e+11	1.07995	1.03832e+11
Norway	13	2016	1227	70460.6	6.07757	6077.57	0.0468	4.68	7.54104e+11	2.0446	3.68827e+11	9.88381e+10	1.11173	8.89051e+10
Norway	13	2017	1152	75496.8	6.35006	6350.06	0.0416	4.16	8.36305e+11	2.09919	3.98394e+11	1.12066e+11	1.07988	1.03776e+11
Norway	13	2018	1082	82267.8	6.4326	6432.6	0.038	3.8	8.94892e+11	2.04781	4.37e+11	1.12118e+11	0.919589	1.21922e+11
Norway	13	2019	957	75719.8	6.67391	6673.91	0.0369	3.69	8.71847e+11	2.15302	4.04941e+11	1.17151e+11	1.13326	1.03375e+11
Norway	13	2020	880	67329.7	6.69883	6698.83	0.0442	4.42	8.24367e+11	2.27601	3.62198e+11	1.14234e+11	1.3886	8.22657e+10
Portugal	14	2005	158	18780.1	2.0104	2010.4	0.0758	7.58	1.4943e+11	0.75755	1.97254e+11	3.26194e+11	8.44036	3.86469e+10
Portugal	14	2006	184	19839.5	2.33818	2338.18	0.0765	7.65	1.99254e+11	0.95448	2.08756e+11	3.84191e+11	8.52996	4.50401e+10
Portugal	14	2007	250	22811.1	2.66485	2664.85	0.0796	7.96	2.70359e+11	1.12417	2.40496e+11	4.08418e+11	7.84093	5.20879e+10
Portugal	14	2008	381	24949	3.81376	3813.76	0.0755	7.55	3.80202e+11	1.44335	2.63416e+11	3.94178e+11	6.92598	5.69129e+10
Portugal	14	2009	571	23151.2	3.7565	3756.5	0.0943	9.43	3.86578e+11	1.58001	2.44668e+11	1.93625e+11	4.41237	4.38822e+10
Portugal	14	2010	499	22520.6	3.91876	3918.76	0.1077	10.77	3.65573e+11	1.53529	2.38113e+11	1.96029e+11	4.00569	4.89376e+10
Portugal	14	2011	571	23217.3	4.16827	4168.27	0.1268	12.68	3.57237e+11	1.45741	2.45118e+11	2.30021e+11	3.90604	5.88884e+10
Portugal	14	2012	621	20563.7	4.03733	4037.33	0.1553	15.53	2.98089e+11	1.37861	2.16224e+11	1.95865e+11	3.43873	5.69587e+10
Portugal	14	2013	647	21653.2	3.61055	3610.55	0.1618	16.18	2.99952e+11	1.32468	2.26434e+11	1.67835e+11	2.71753	6.17602e+10
Portugal	14	2014	722	22103.7	3.66238	3662.38	0.1389	13.89	2.96555e+11	1.28992	2.29902e+11	1.43976e+11	2.29164	6.28267e+10
Portugal	14	2015	925	19250.1	3.72977	3729.77	0.1244	12.44	2.47907e+11	1.2433	1.99394e+11	1.33009e+11	2.45044	5.42795e+10
Portugal	14	2016	724	19992	4.00458	4004.58	0.1107	11.07	2.6438e+11	1.28075	2.06426e+11	1.80418e+11	3.31921	5.43555e+10
Portugal	14	2017	644	21490.4	4.36773	4367.73	0.0887	8.87	2.92033e+11	1.31928	2.21358e+11	1.94007e+11	3.22126	6.0227e+10
Portugal	14	2018	661	23562.6	4.64613	4646.13	0.0699	6.99	3.27014e+11	1.34955	2.42313e+11	2.00911e+11	3.02534	6.64095e+10
Portugal	14	2019	703	23330.8	4.90569	4905.69	0.0646	6.46	3.34931e+11	1.39562	2.39987e+11	2.2062e+11	3.4001	6.48863e+10
Portugal	14	2020	695	22194.6	5.21485	5214.85	0.0679	6.79	3.69639e+11	1.6174	2.28539e+11	2.19798e+11	3.6855	5.96388e+10
Slovak Republic	15	2005	155	11690.1	2.02272	2022.72	0.1626	16.26	3.09848e+10	0.49332	6.28087e+10	3.63091e+11	9.39175	3.86607e+10
Slovak Republic	15	2006	193	13170.8	2.18126	2181.26	0.1337	13.37	3.3606e+10	0.47488	7.07673e+10	6.31313e+11	12.6355	4.99633e+10
Slovak Republic	15	2007	239	16106.1	2.28837	2288.37	0.1114	11.14	3.87339e+10	0.44746	8.6564e+10	9.22948e+11	14.567	6.33587e+10
Slovak Republic	15	2008	167	18753.6	2.33125	2331.25	0.0951	9.51	4.6543e+10	0.46137	1.0088e+11	1.20189e+12	16.8444	7.13527e+10
Slovak Republic	15	2009	176	16597.2	2.46059	2460.59	0.1203	12.03	4.22608e+10	0.47272	8.93993e+10	1.11723e+12	20.8345	5.3624e+10
Slovak Republic	15	2010	234	16841.8	2.8094	2809.4	0.1438	14.38	5.51989e+10	0.60791	9.08012e+10	1.1737e+12	19.0482	6.16174e+10
Slovak Republic	15	2011	224	18430.1	2.83344	2833.44	0.1362	13.62	6.52047e+10	0.65537	9.94929e+10	1.22317e+12	16.0803	7.60661e+10
Slovak Republic	15	2012	168	17429.8	2.82017	2820.17	0.1396	13.96	7.51886e+10	0.79773	9.42532e+10	1.2909e+12	16.7034	7.72837e+10
Slovak Republic	15	2013	184	18208.4	2.71637	2716.37	0.1422	14.22	8.11314e+10	0.82309	9.85693e+10	1.45779e+12	17.582	8.2914e+10
Slovak Republic	15	2014	211	18655.8	2.71555	2715.55	0.1318	13.18	8.89605e+10	0.88002	1.01089e+11	1.46917e+12	17.6713	8.31387e+10
Slovak Republic	15	2015	228	16342.2	2.65021	2650.21	0.1148	11.48	1.02882e+11	1.16071	8.86369e+10	1.19386e+12	16.6668	7.16313e+10
Slovak Republic	15	2016	220	16512.3	2.59996	2599.96	0.0967	9.67	7.09347e+10	0.79102	8.96749e+10	1.2214e+12	16.5535	7.3785e+10
Slovak Republic	15	2017	183	17538	2.79484	2794.84	0.0813	8.13	8.46083e+10	0.88694	9.53935e+10	1.31884e+12	16.5481	7.96976e+10
Slovak Republic	15	2018	217	19390	2.99596	2995.96	0.0654	6.54	8.86831e+10	0.8397	1.05613e+11	1.27062e+12	14.3242	8.87043e+10
Slovak Republic	15	2019	206	19303.5	3.11104	3111.04	0.0575	5.75	8.69375e+10	0.82574	1.05284e+11	1.12325e+12	13.2817	8.45711e+10
Slovak Republic	15	2020	206	19266.5	3.16431	3164.31	0.0669	6.69	9.58217e+10	0.91109	1.05173e+11	1.03914e+12	12.9555	8.02083e+10
Sweden	16	2005	2522	43437.1	6.08511	6085.11	0.0749	7.49	1.31769e+12	3.35958	3.92218e+11	1.52408e+12	11.2179	1.35861e+11
Sweden	16	2006	2446	46593.6	6.12665	6126.65	0.0707	7.07	1.47025e+12	3.475	4.23093e+11	1.5984e+12	10.2568	1.55838e+11
Sweden	16	2007	2527	53700	4.99971	4999.71	0.0616	6.16	1.58863e+12	3.23383	4.91253e+11	1.55676e+12	8.59604	1.81102e+11
Sweden	16	2008	2549	56152.6	5.43717	5437.17	0.0623	6.23	1.79644e+12	3.46999	5.17706e+11	1.69878e+12	8.6088	1.97331e+11
Sweden	16	2009	2186	46947	5.07973	5079.73	0.0835	8.35	1.48217e+12	3.39528	4.36537e+11	1.24035e+12	8.99024	1.37966e+11
Sweden	16	2010	2196	52869	5.25145	5251.45	0.0861	8.61	1.57068e+12	3.16789	4.95813e+11	1.61628e+12	9.72344	1.66225e+11
Sweden	16	2011	2004	60755.8	5.14455	5144.55	0.078	7.8	1.82965e+12	3.18702	5.74094e+11	1.80363e+12	9.16681	1.96756e+11
Sweden	16	2012	2288	58037.8	5.1641	5164.1	0.0798	7.98	1.78466e+12	3.23025	5.52484e+11	1.32563e+12	7.19412	1.84266e+11
Sweden	16	2013	2332	61126.9	6.67435	6674.35	0.0805	8.05	1.91335e+12	3.26042	5.86842e+11	1.20606e+12	6.72995	1.79208e+11
Sweden	16	2014	1984	60020.4	6.87599	6875.99	0.0795	7.95	1.80516e+12	3.10184	5.81964e+11	1.24468e+12	6.91355	1.80035e+11
Sweden	16	2015	2038	51545.5	6.83403	6834.03	0.0743	7.43	1.62594e+12	3.21903	5.05104e+11	1.04682e+12	6.92323	1.51204e+11
Sweden	16	2016	2032	51965.2	7.15453	7154.53	0.0699	6.99	1.67452e+12	3.24736	5.15655e+11	1.01936e+12	6.78225	1.50299e+11
Sweden	16	2017	1992	53791.5	7.38342	7383.42	0.0672	6.72	1.81933e+12	3.36279	5.41019e+11	1.00749e+12	6.08598	1.65543e+11
Sweden	16	2018	1838	54589.1	7.53648	7536.48	0.0636	6.36	1.8447e+12	3.32106	5.55455e+11	1.04584e+12	5.7861	1.8075e+11
Sweden	16	2019	1802	51939.4	7.8344	7834.4	0.0683	6.83	1.80856e+12	3.38758	5.3388e+11	1.1038e+12	6.15142	1.79438e+11
Sweden	16	2020	1764	52300.2	7.93018	7930.18	0.0829	8.29	1.90994e+12	3.52722	5.41487e+11	1.16177e+12	6.64251	1.74899e+11
France	17	2005	14327	34773.2	3.31326	3313.26	0.0849	8.49	4.50706e+12	2.05151	2.19695e+12	2.76618e+12	6.29131	4.39683e+11
France	17	2006	14529	36474.2	3.42375	3423.75	0.0845	8.45	4.75928e+12	2.05094	2.32054e+12	3.19838e+12	6.59391	4.8505e+11
France	17	2007	14722	41561.2	3.58581	3585.81	0.0766	7.66	5.38639e+12	2.02451	2.66059e+12	2.63616e+12	4.84307	5.44317e+11
France	17	2008	14658	45519.3	3.65988	3659.88	0.0706	7.06	6.03985e+12	2.06117	2.9303e+12	2.57051e+12	4.26274	6.03018e+11
France	17	2009	14100	41740.2	3.74728	3747.28	0.0874	8.74	5.97455e+12	2.21207	2.70089e+12	2.00563e+12	4.25802	4.71025e+11
France	17	2010	14748	40678	3.87301	3873.01	0.0887	8.87	5.76273e+12	2.17857	2.64519e+12	2.24095e+12	4.41397	5.07695e+11
France	17	2011	14655	43848.1	3.94239	3942.39	0.0881	8.81	6.27931e+12	2.19161	2.86516e+12	2.48122e+12	4.22784	5.86877e+11
France	17	2012	14540	40872.4	4.07325	4073.25	0.094	9.4	5.97673e+12	2.22707	2.68367e+12	2.28204e+12	4.06821	5.60945e+11
France	17	2013	14690	42605	4.15482	4154.82	0.0992	9.92	6.29025e+12	2.23703	2.81188e+12	2.30495e+12	3.95794	5.82361e+11
France	17	2014	14500	43068.5	4.23364	4233.64	0.1029	10.29	6.49995e+12	2.27592	2.85596e+12	2.23997e+12	3.85836	5.80549e+11
France	17	2015	14306	36652.9	4.33601	4336.01	0.1035	10.35	5.43212e+12	2.22702	2.43919e+12	2.10046e+12	4.02415	5.21964e+11
France	17	2016	14206	37062.5	4.4147	4414.7	0.1005	10.05	5.49587e+12	2.22238	2.47296e+12	2.07506e+12	3.98158	5.21166e+11
France	17	2017	14415	38781	4.56991	4569.91	0.0941	9.41	5.70643e+12	2.19888	2.59515e+12	2.20151e+12	3.93331	5.59708e+11
France	17	2018	14303	41592.8	4.69974	4699.74	0.0902	9.02	6.13078e+12	2.19666	2.79096e+12	2.42963e+12	3.96157	6.13301e+11
France	17	2019	14103	40578.6	4.81153	4811.53	0.0841	8.41	5.98111e+12	2.19179	2.72887e+12	2.26115e+12	3.78505	5.97389e+11
France	17	2020	12771	39037.1	4.92619	4926.19	0.0801	8.01	6.19421e+12	2.35493	2.63032e+12	1.90378e+12	3.77209	5.04701e+11
